# Supplementary material
Source: PubMed Central journal article supplement (PMC3378335)
Supplement: NIHMS254075-supplement-1_si_001.pdf [file NIHMS254075-supplement-1_si_001.pdf]

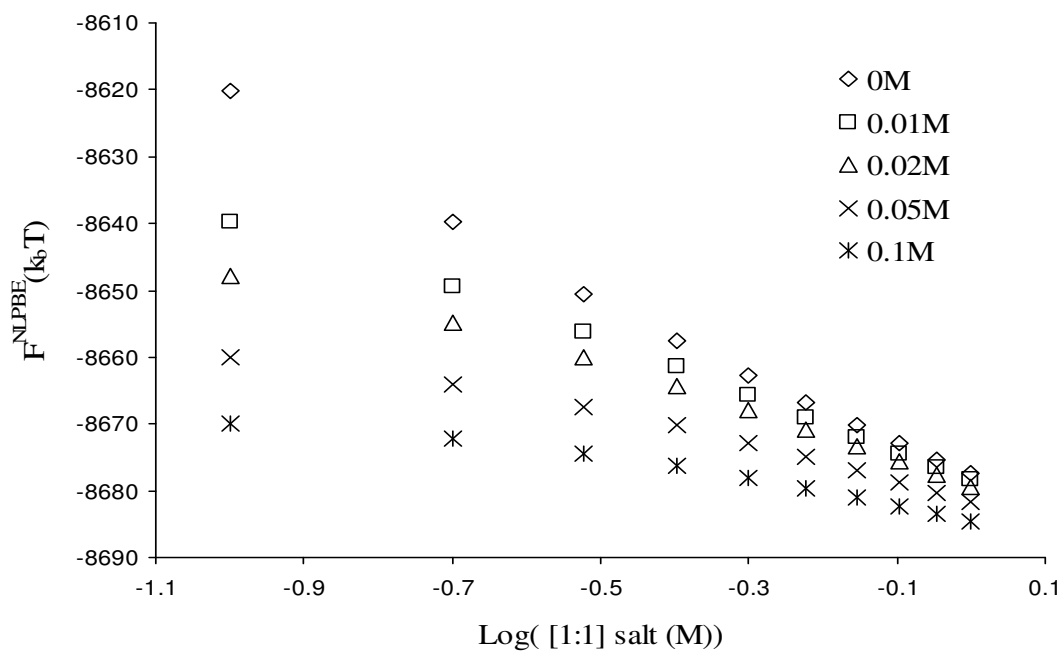

**Figure A.1.** The electrostatic free energy (in  $k_bT$ ) computed with the nonlinear Poisson-Boltzmann equation,  $F^{NLPBE}$ , of a spherical cavity of radius 20 Å and a central charge of  $-50e$  at concentrations of 2:1 salt, [MgCl<sub>2</sub>], of 0, 0.01, 0.02, 0.05, and 0.1 M and Stern layer of width 1.5 Å is plotted against the logarithm of the concentration of 1:1 salt, [NaCl]. The dielectric constant of spherical cavity is 4 and the dielectric constant of the solvent is 78.5.

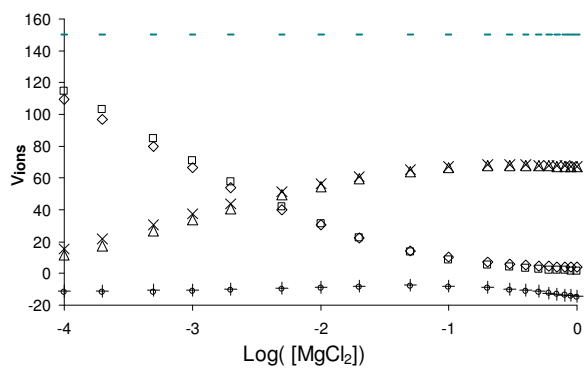

(a)

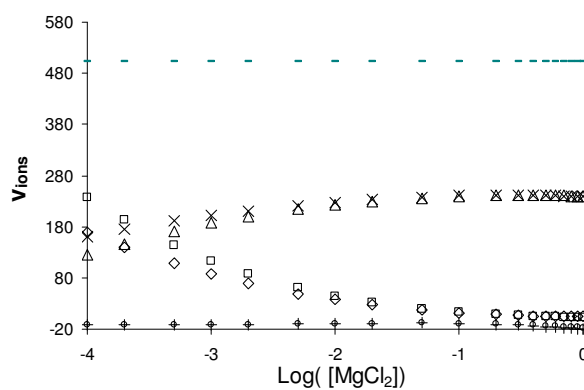

(b)

**Figure A.2.** The numbers of bound  $\text{Mg}^{2+}$ ,  $\text{Na}^+$ , and  $\text{Cl}^-$  ions ( $v_{\text{Mg}}$ ,  $v_{\text{Na}}$ , and  $v_{\text{Cl}}$ ) for a spherical cavity of radius  $20 \text{ \AA}$  and a central charges of (a)-150e and (b)-500e in a mixed salt solution with an ion radius of  $1.4 \text{ \AA}$  with  $[\text{NaCl}] = 0.1 \text{ M}$  calculated with both the nonlinear Poisson-Boltzmann equation ( $\Delta, \square, \circ$ ), and the size-modified Poisson-Boltzmann equation ( $\times, \diamond, +$ ) are plotted as a function of  $[\text{MgCl}_2]$ . The NLPBE calculations were performed with a Stern layer of  $1.4 \text{ \AA}$ . The ion radius is approximately equal to one half of  $a$ , the size of the lattice spacing used in the SMPBE theory. The dielectric constant of spherical cavity is 4 and the dielectric constant of the solvent is 78.5.

## Volume integration

The volume integral in eq 27 can be evaluated in the limit  $c_{bi} \rightarrow 0$  by first computing the volume integral,  $I$ , which is given by noting that because  $\xi(r) \geq 0$  for all  $r$ , we can write another integral,  $I_u$  that is an upper bound on  $I$ :

This integration can be divided into two regions

$$\lim_{c_{bi} \rightarrow 0} I_u = \lim_{c_{bi} \rightarrow 0} \frac{k_b T}{a^3} \int_{\Gamma}^{R_L} d^3 r \xi_i(r) + \lim_{c_{bi} \rightarrow 0} \frac{k_b T}{a^3} \int_{R_L}^{\infty} d^3 r \xi_i^{LPB}(r) \quad (0)$$
$$= 0$$

where  $\Gamma$  is the boundary of the molecule and  $R_L$  is chosen far enough from the molecule so that for  $R_L < r < \infty$ ,  $\xi_i$  can be approximated by the linear Poisson-Boltzmann equation. As  $c_{bi} \rightarrow 0$ , both terms in eq A1 go to zero, and  $I$  therefore goes to zero.
