# Supplementary material
Source: PubMed Central journal article supplement (PMC3378335)
Supplement: NIHMS254075-supplement-2_si_002.pdf [file NIHMS254075-supplement-2_si_002.pdf]

## Supporting Information

Equation Chapter (Next) Section 1

### The Electrostatic Free Energy of SMPBE

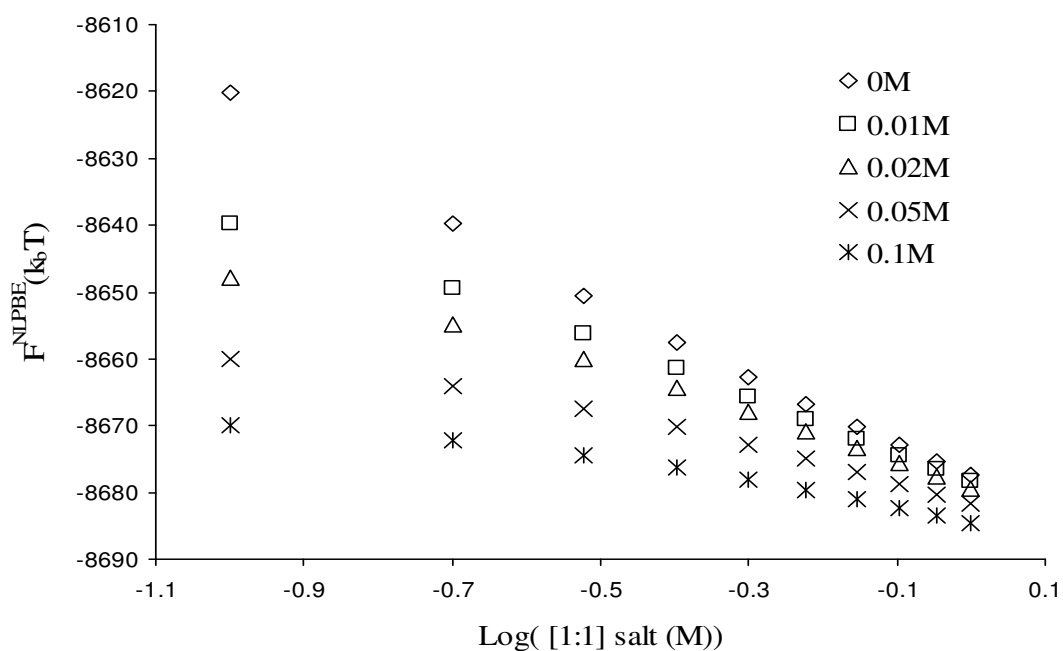

**Figure A.1.** The electrostatic free energy (in  $k_bT$ ) computed with the nonlinear Poisson-Boltzmann equation,  $F^{NLPBE}$ , of a spherical cavity of radius 20 Å and a central charge of  $-50e$  at concentrations of 2:1 salt,  $[\text{MgCl}_2]$ , of 0, 0.01, 0.02, 0.05, and 0.1 M and Stern layer of width 1.5 Å is plotted against the logarithm of the concentration of 1:1 salt,  $[\text{NaCl}]$ .

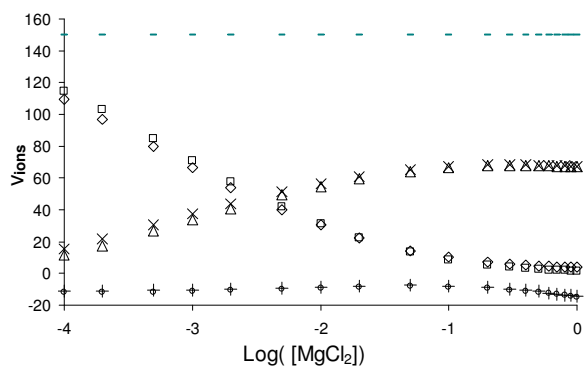

(a)

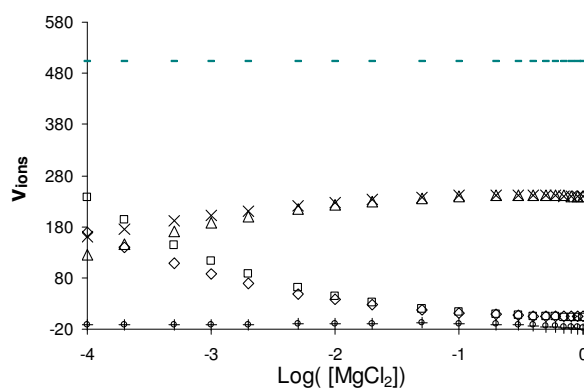

(b)

**Figure A.2.** The numbers of bound  $\text{Mg}^{2+}$ ,  $\text{Na}^+$ , and  $\text{Cl}^-$  ions ( $v_{\text{Mg}}$ ,  $v_{\text{Na}}$ , and  $v_{\text{Cl}}$ ) for a spherical cavity of radius  $20 \text{ \AA}$  and central charges of (a)-150e and (b)-500e in a mixed salt solution with an ion radius of  $1.4 \text{ \AA}$  with  $[\text{NaCl}] = 0.1 \text{ M}$  calculated with both the nonlinear Poisson-Boltzmann equation ( $\Delta, \square, \circ$ ), and the size-modified Poisson-Boltzmann equation ( $\times, \diamond, +$ ) are plotted as a function of  $[\text{MgCl}_2]$ . The NLPBE calculations were performed with a Stern layer of  $1.4 \text{ \AA}$ .

## Volume integration

The volume integral in eq 27 can be evaluated in the limit  $c_{bi} \rightarrow 0$  by first computing the volume integral,  $I$ , which is given by noting that because  $\xi(r) \geq 0$  for all  $r$ , we can write another integral,  $I_u$  that is an upper bound on  $I$ :

This integration can be divided into two regions

$$\begin{aligned} \lim_{c_{bi} \rightarrow 0} I_u &= \lim_{c_{bi} \rightarrow 0} \frac{k_b T}{a^3} \int_{\Gamma}^{R_L} d^3 r \xi_i(r) + \lim_{c_{bi} \rightarrow 0} \frac{k_b T}{a^3} \int_{R_L}^{\infty} d^3 r \xi_i^{LPB}(r) \\ &= 0 \end{aligned} \quad (\text{A1})$$

where  $\Gamma$  is the boundary of the molecule and  $R_L$  is chosen far enough from the molecule so that for  $R_L < r < \infty$ ,  $\xi_i$  can be approximated by the linear Poisson-Boltzmann equation. As  $c_{bi} \rightarrow 0$ , both terms in eq A1 go to zero, and  $I$  therefore goes to zero.

## Taylor series of volume-exclusion factor

The volume exclusion factor  $\xi(r)$  is defined from:

$$\frac{1}{1 + \xi(r)} = \frac{1 - C}{1 - C_0} \quad (\text{A.2})$$

, where  $\xi(r) = \sum_k \xi_k$  and  $\xi(r) = a^3 g(r, a)$ , and

$$g(r, a) = \sum_k \{c_{bi}^+ \exp(-z_i^+ \phi) + c_{bi}^- \exp(z_i^- \phi) - (c_{bi}^+ + c_{bi}^-)\}. \quad (\text{A.3})$$

The NLPB equation is subtracted from SMPB equation in the solvent region

$$\nabla^2(\phi - \phi_{NL}) = -\frac{4\pi}{k_b T \epsilon} \left\{ \frac{\rho_{NL}(\phi)}{1 + \xi(\phi)} - \rho_{NL}(\phi_{NL}) \right\} \quad (\text{A.4})$$

The Taylor expansion of equation on variables  $\rho_{NL}(\phi)$  and  $\xi(\phi)$  around  $\phi_{NL}$  results in

$$\nabla^2(\phi - \phi_{NL}) = -\frac{4\pi}{k_b T \varepsilon} \left\{ -\xi_{NL}(\phi_{NL})\rho_{NL}(\phi_{NL}) + (\phi - \phi_{NL})(1 - \xi_{NL}(\phi_{NL})) \frac{d\rho_{NL}(\phi)}{d\phi} \Big|_{\phi=\phi_{NL}} \right\} + O(a^3(\phi - \phi_{NL})^2) \quad (\text{A.5})$$

The term  $(\phi - \phi_{NL})$  asymptotically goes to zero as  $a \rightarrow 0$ . If the higher order term  $O(a^3(\phi - \phi_{NL})^2)$  is ignored, the ansatz  $(\phi - \phi_{NL}) = O(a^3)F(\phi_{NL})$  serves as the solution to the equation (A.5). This form of solution gives the derivative of electrostatic potential w.r.t.  $a$  as:

$$\frac{d\phi}{da} = O(a^2)F(\phi_{NL}) \quad (\text{A.6})$$

$$\text{with } \lim_{a \rightarrow 0} \frac{d\phi}{da} = 0.$$

Note that for  $\phi_{NL} = 0$ , the  $\phi = 0$  and therefore  $F(\phi_{NL} = 0) = 0$ .

The Taylor series of volume-exclusion factor  $\xi(r)$  around  $\phi = \phi_{NL}$  is

$$\begin{aligned} \xi(\phi) &= \xi(\phi_{NL}) - a^3(\phi - \phi_{NL})\rho(\phi_{NL}) + O(a^3(\phi - \phi_{NL})^2) \\ &= a^3 g(r, a=0) - O(a^6)\rho(\phi_{NL})F(\phi_{NL}) + O(a^9 F^2(\phi_{NL})) \end{aligned} \quad (\text{A.7})$$

Therefore it is valid that in the first order one could approximate the volume-exclusion factor as  $\xi(r) = a^3 f(r)$ , where  $f(r) = g(r, a=0)$  is a function independent of  $a$ .
